# Supplementary material
Source: PubMed Central journal article supplement (PMC5075127)

Supplemental figure legend; Dendrogram generated by Bionumerics software showing the cluster analysis of *Xba*I-PFGE patterns of *mcr-1* carrying *Escherichia coli* isolated from animals and animal carcasses. A cutoff similarity value of 95% was used to define clones. Similarity analysis was performed by using the Dice coefficient, and clustering was done by the unweighted-pair group method with arithmetic averages (UGPMA). Abbreviations: AMP, ampicillin; CIP, ciprofloxacin; CHL, chloramphenicol; COL, colistin; NAL, nalidixic acid; FFC, florfenicol; TET, tetracycline; STR, streptomycin; SXT, trimethoprim/sulfamethoxazole; CEF, cephalothin; XNL, ceftiofur; GEN, gentamicin; ST, sequence type

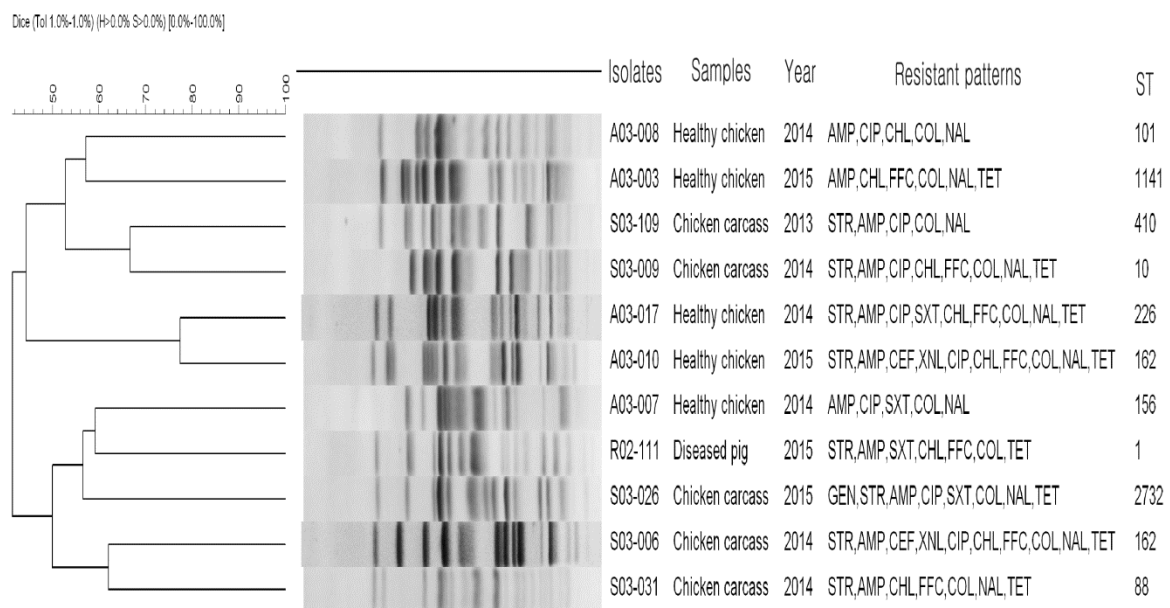

Supplement: AAC.01472-16_zac011165652so1.pdf [file AAC.01472-16_zac011165652so1.pdf]
